# Supplementary material
Source: Springer Nature journal article supplement (http://www.springermedizin.de/resource/supplementary/12937_2012_533_MOESM6_ESM.pdf/25653566)

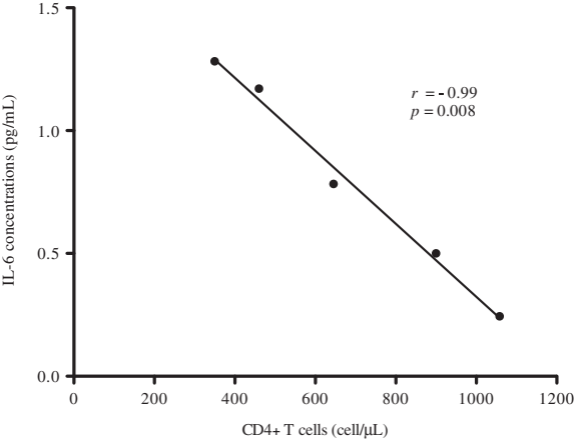

Supplement: MOESM6 [file 25653566]
